# Supplementary material for: CO2methanation mechanism over Ni/Y2O3: anin situdiffuse reflectance infrared Fourier transform spectroscopic study
Source: Royal Society of Chemistry journal article supplement (doi:10.1039/d0cp06257j), 2021-01-01
Supplement: d0cp06257j1.pdf [file d0cp06257j1.pdf]

Supporting information

**CO<sub>2</sub> methanation mechanism over Ni/Y<sub>2</sub>O<sub>3</sub>: An *in situ* diffuse reflectance infrared Fourier transform spectroscopic study**

Masitah Hasan, Toshiki Asakoshi, Hiroki Muroyama\*, Toshiaki Matsui, Koichi Eguchi

Department of Energy and Hydrocarbon Chemistry, Graduate School of Engineering, Kyoto University, Nishikyo-ku, Kyoto 615-8510, Japan.

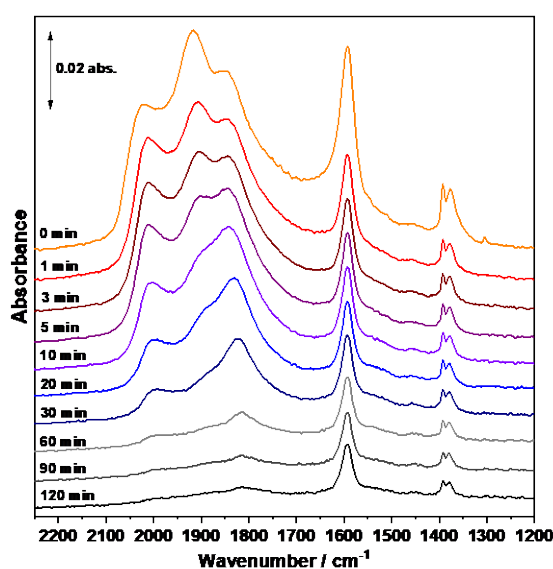

Fig. S1 Infrared spectra of species formed on 20 wt.% Ni/Al<sub>2</sub>O<sub>3</sub> under the prolonged exposure to 5% H<sub>2</sub>–95% N<sub>2</sub> at 300 °C for 120 min after the measurement in 10% CO<sub>2</sub>–40% H<sub>2</sub>–50% N<sub>2</sub> (Fig. 3).

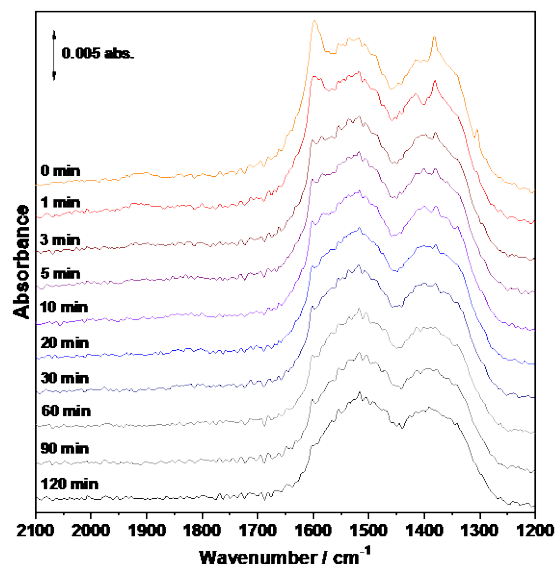

Fig. S2 Infrared spectra of species formed on 20 wt.% Ni/Y<sub>2</sub>O<sub>3</sub> under the prolonged exposure to 5% H<sub>2</sub>-95% N<sub>2</sub> at 250 °C for 120 min after the measurement in 10% CO<sub>2</sub>-40% H<sub>2</sub>-50% N<sub>2</sub> (Fig. 6).
